# Supplementary material
Source: publisher figshare collection journal article supplement (https://gsapubs.figshare.com/ndownloader/files/31651079)
Supplement: Supplementary file 1 [file 31651079]

## Sheet: Sheet1
Supplementary Table 1. Some characteristics of the distinctive minerals, geochemical and isotope compositions of Songpan-Ganzi granitoids subdivisions in this study
Subdivisions	I-type	Adakitic I-type	High Ba-Sr (I-type)	S-type	A-type
SiO2 range (wt.%)	52-75	61-75	54-65	70-74	71-78
Mineral assemblage (distinguishing minerals highlighted)	Feldspar, Quartz, Biotite, Amphibole		Feldspar, Quartz, Biotite, amphibole, Pyroxene	Feldspar, Quartz, Biotite, Muscovite	Feldspar, Quartz, Biotite, Arfvedsonite
A/CNKa	0.7-1.1 (all ≤1.1)		0.7-1.3 (most<1.1)	1.07-1.23 (most>1.1)	0.94-1.06 (all<1.1)
Sr/Yb	2.5-50.7 (most≤20)	20.3-110.9 (all≥20)	37-74 (all≥20)	1.7-44.7 (most≤20)	0.2-4.5 (all≤20)
Yb (ppm)b	1.4-5.6 (most≥1.9)	0.4-1.8 (all≤1.9)	1.3-2.3 (most≤1.9)	0.5-2.8 (most≤1.9)	3.8-10.1 (all≥1.9)
10000*Ga/Alc	1.1-3.5 (most<2.6)		1.9-2.9 (most<2.6)	1.7-3.7 (most<2.6)	2.7-4.3 (all>2.6)
K2O/Na2O	0.5-1.6		1.1-3.2	1.0-2.2	1.0-1.6
FeOT/(FeOT+MgO)	0.47-0.93		0.49-0.72	0.68-0.86	>0.83
Th/Ce	0.11-0.80		0.04-0.29	0.21-0.48	0.21-0.70
Ba (ppm)	223-2609		2171-4556	61-649	65-591
Sr (ppm)	122-943	228-1807	829-1662	34-370	16-176
Whole-rock Sri	0.7046-0.7101	0.7047-0.7117	0.7054-0.7066	0.7051-0.7148	0.7039-0.7119
Whole-rock εNd(t)	-8.8 to -3.1	-9.4 to -2.3	-3.2 to +2.1	-11.4 to -5.3	-4.3 to -0.1
zircon δ18O (‰)	+6.6 to +9.8	+6.6 to +9.4	+7.3 to +8.8	+7.9 to +11.6	+4.1 to +8.6
Whole-rock δ7Li (‰)	-4.5 to +4.7	-2.2 to +3.8	-0.7 to +5.1	-1.6 to +2.6	+1.9 to +2.3
Whole-rock δ11B (‰)	-15.01 to -15.10	-12.21 to -14.45	-11.54 to -14.59	-14.50 to -16.53	-10.71 to -10.77
Whole-rock δ26Mg (‰)	-0.31 to -0.37	-0.30 to -0.44	-0.23 to -0.33	-0.30 to -0.34	-0.53 to -0.59
a A/CNK>1.1 in granites is considered to suggest dominantly sedimentary sources by Chappell and White (e.g., 2001) and others.
b Adakite subdivision set at Sr/Y≥20-40 and Yb≤1.9 is defined by Defant and Drummond (1990).
C A-type subdivision set at 10000*Ga/Al>2.6 is defined by Whalen et al. (1987).
Whole-rock geochemical and Sr-Nd isotopic data are from Table S2.

## Sheet: G49509
Li, S., et al., 2022, Role of sediment in generating contemporaneous, diverse “type” granitoid magmas: Geology, https://doi.org/10.1130/G49509.1
